# Supplementary material for: Short-term outcomes of COVID-19 and risk factors for progression
Source: PubMed Central journal article supplement — Eur Respir J. 2020 May 28;55(5):2000990. doi: 10.1183/13993003.00990-2020 (PMC7173674; doi:10.1183/13993003.00990-2020), 2020-05-28
Supplement: ERJ-00990-2020.Shareable.pdf [file ERJ-00990-2020.Shareable.pdf]

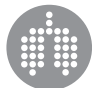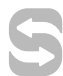

SHAREABLE PDF

AGORA

RESEARCH LETTER

ERJ European Respiratory Journal Eur Respir J 0903-1936/1399-3003 European Respiratory Society 10.1183/13993003.00990-2020 ERJ-00990-2020 AGORA RESEARCH LETTER

Short-term outcomes of COVID-19 and risk factors for progression L. LONG ET AL. RESEARCH LETTER COVID-19: short-term outcomes and risk factors for progression

Long Li<sup>1,4</sup>, Zeng Xiansheng<sup>2,4</sup>, Zhang Xu<sup>3,4</sup>, Xiao Wei<sup>3,4</sup>, Guo E<sup>2,4</sup>, Zhan Wenzhi<sup>1</sup>, Yang Xuejiao<sup>2</sup>, Li Chunyan<sup>3</sup>, Wu Caiyun<sup>2</sup>, Xu Tingting<sup>1</sup>, Zhan Chen<sup>1</sup>, Chen Yuehan<sup>1</sup>, Jiang Mei<sup>1</sup>, Zhong Nanshan<sup>1</sup>, Lai Kefang<sup>1</sup>,

1State Key Laboratory of Respiratory Disease, National Clinical Research Center for Respiratory Disease, Guangzhou Institute of Respiratory Health, The First Affiliated Hospital of Guangzhou Medical University, Guangzhou, China. 2Xiangyang Central Hospital, Affiliated Hospital of Hubei University of Arts and Science, Xiangyang, China. 3The First People's Hospital of Jingzhou, Jingzhou, China. 4These authors contributed equally to this article.

**Correspondence:** Kefang Lai, State Key Laboratory of Respiratory Disease, National Clinical Research Center for Respiratory Disease, Guangzhou Institute of Respiratory Health, The First Affiliated Hospital of Guangzhou Medical University, 151 Yanjiang Rd, Guangzhou, 510120, China. E-mail: klai@163.com 202020205506032020110420202020

#### *To the Editor:*

Coronavirus disease 2019 (COVID-19) has now become a worldwide health concern. The severity of COVID-19 has been classified as mild, moderate, severe and critical [1]. To date, there have been a few studies focused on the clinical course and outcome of critical cases [2–4]. However, information regarding outcomes of mild-to-moderate cases is lacking, despite the fact that mild-to-moderate cases have accounted for approximately 80% of laboratory-confirmed patients [1, 5]. This study aimed to investigate short-term outcomes of patients rated with different severities on admission, and to identify risk factors for progression, thereby helping the management of COVID-19 in clinical practice.
